# Supplementary material for: Bioinspired porous organic polymer-functionalized membranes for efficient CO2 capture
Source: Royal Society of Chemistry journal article supplement (doi:10.1039/c9se00857h), 2019-11-25
Supplement: c9se00857h1.pdf [file c9se00857h1.pdf]

## Supporting Information

### **Bioinspired porous organic polymers functionalized membranes for efficient CO<sub>2</sub> capture**

Zhen Wang<sup>†a</sup>, Yiming Zhang<sup>†a</sup>, Jing Wang<sup>a</sup>, Yatao Zhang<sup>\*a, b</sup>

<sup>a</sup> College of Chemical Engineering, Zhengzhou University, Zhengzhou 450001, P. R. China

<sup>b</sup> Engineering Research Center of Advanced Functional Material Manufacturing of Ministry of Education, Zhengzhou University, Zhengzhou 450001, China

E-mail: [zhangyatao@zzu.edu.cn](mailto:zhangyatao@zzu.edu.cn)

<sup>†</sup>These authors are equally contributed.

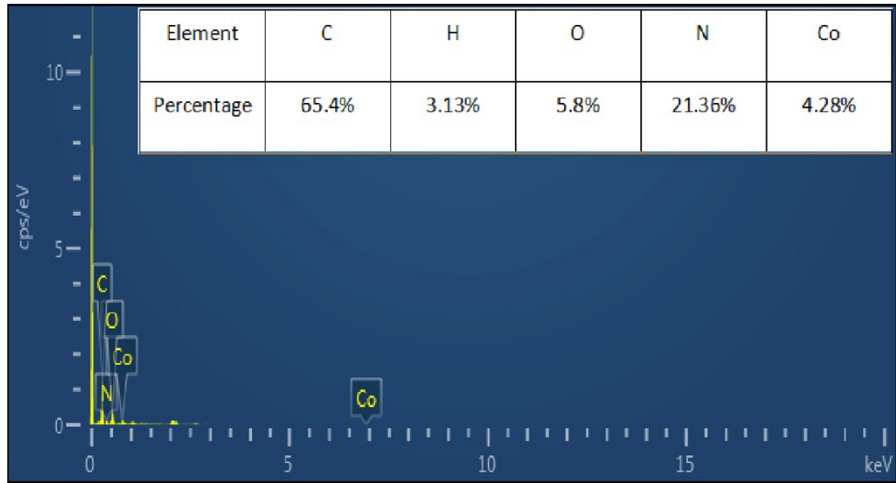

Fig. S1 Element distribution of powder Co-BBP@POP-1

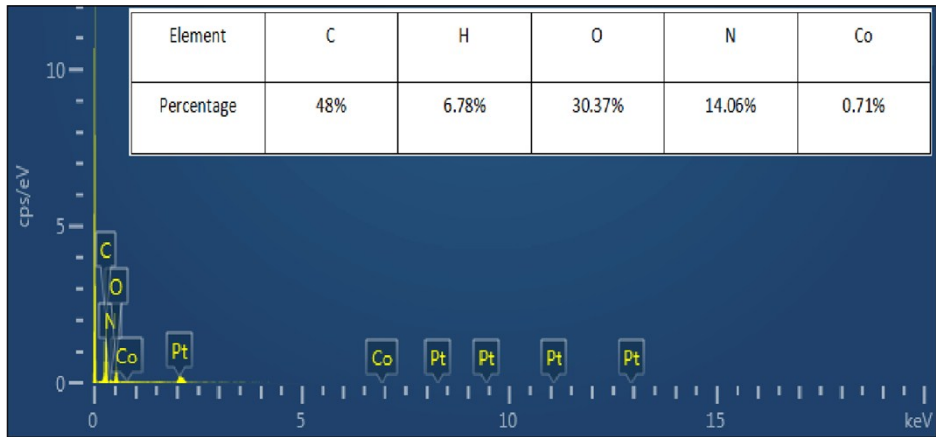

Fig. S2 Elemental distribution of the cross section of the mixed matrix membrane (5wt%)

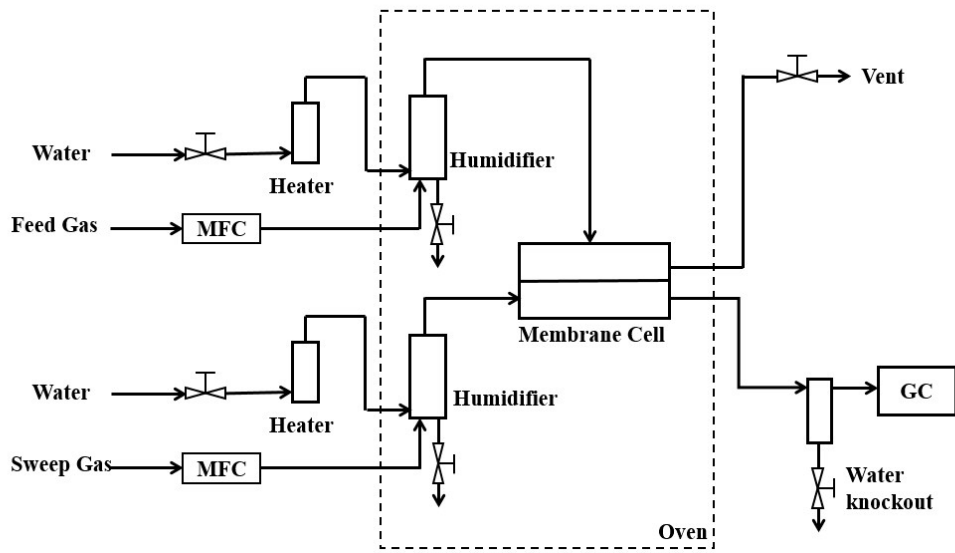

Fig. S3 Schematic diagram of dense membrane gas permeation testing apparatus

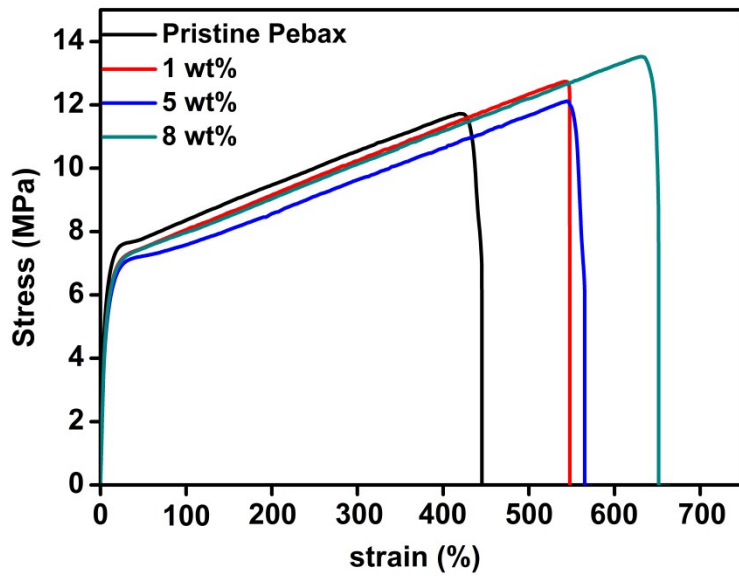

Fig. S4 The stress-strain curves of the pristine Pebax membrane and Co-BBP@POP-1Pebax membranes

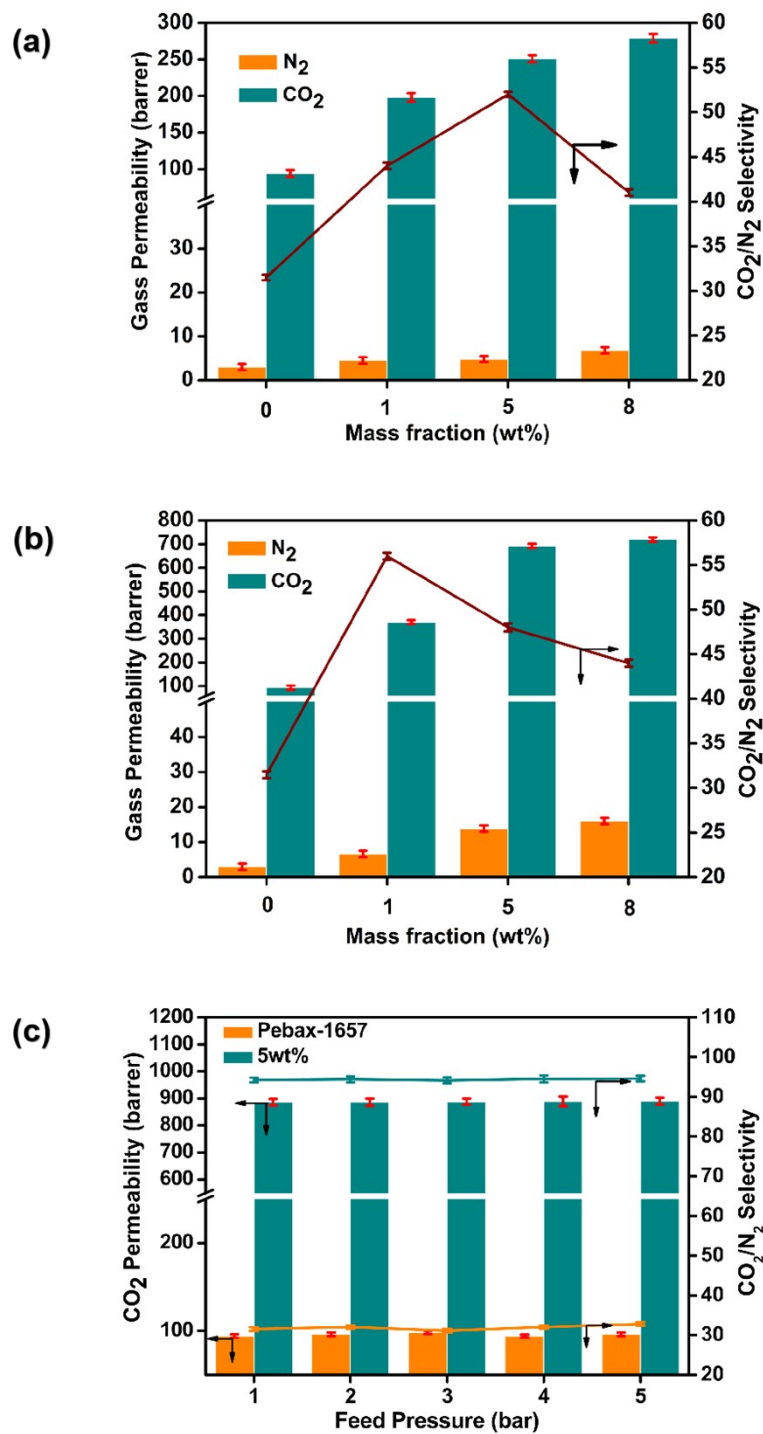

**Fig. S5** CO<sub>2</sub>/N<sub>2</sub> permeability and selectivity of pristine Pebax membrane and POP-1 Pebax membranes (a), Co-BBP Pebax membranes (b); Performance of MMMs with 5wt% Co-BBP@POP loading and pristine Pebax membrane under 1-5 bar (c).
